# Supplementary material
Source: publisher site journal article supplement (https://www.dovepress.com/article/543644)

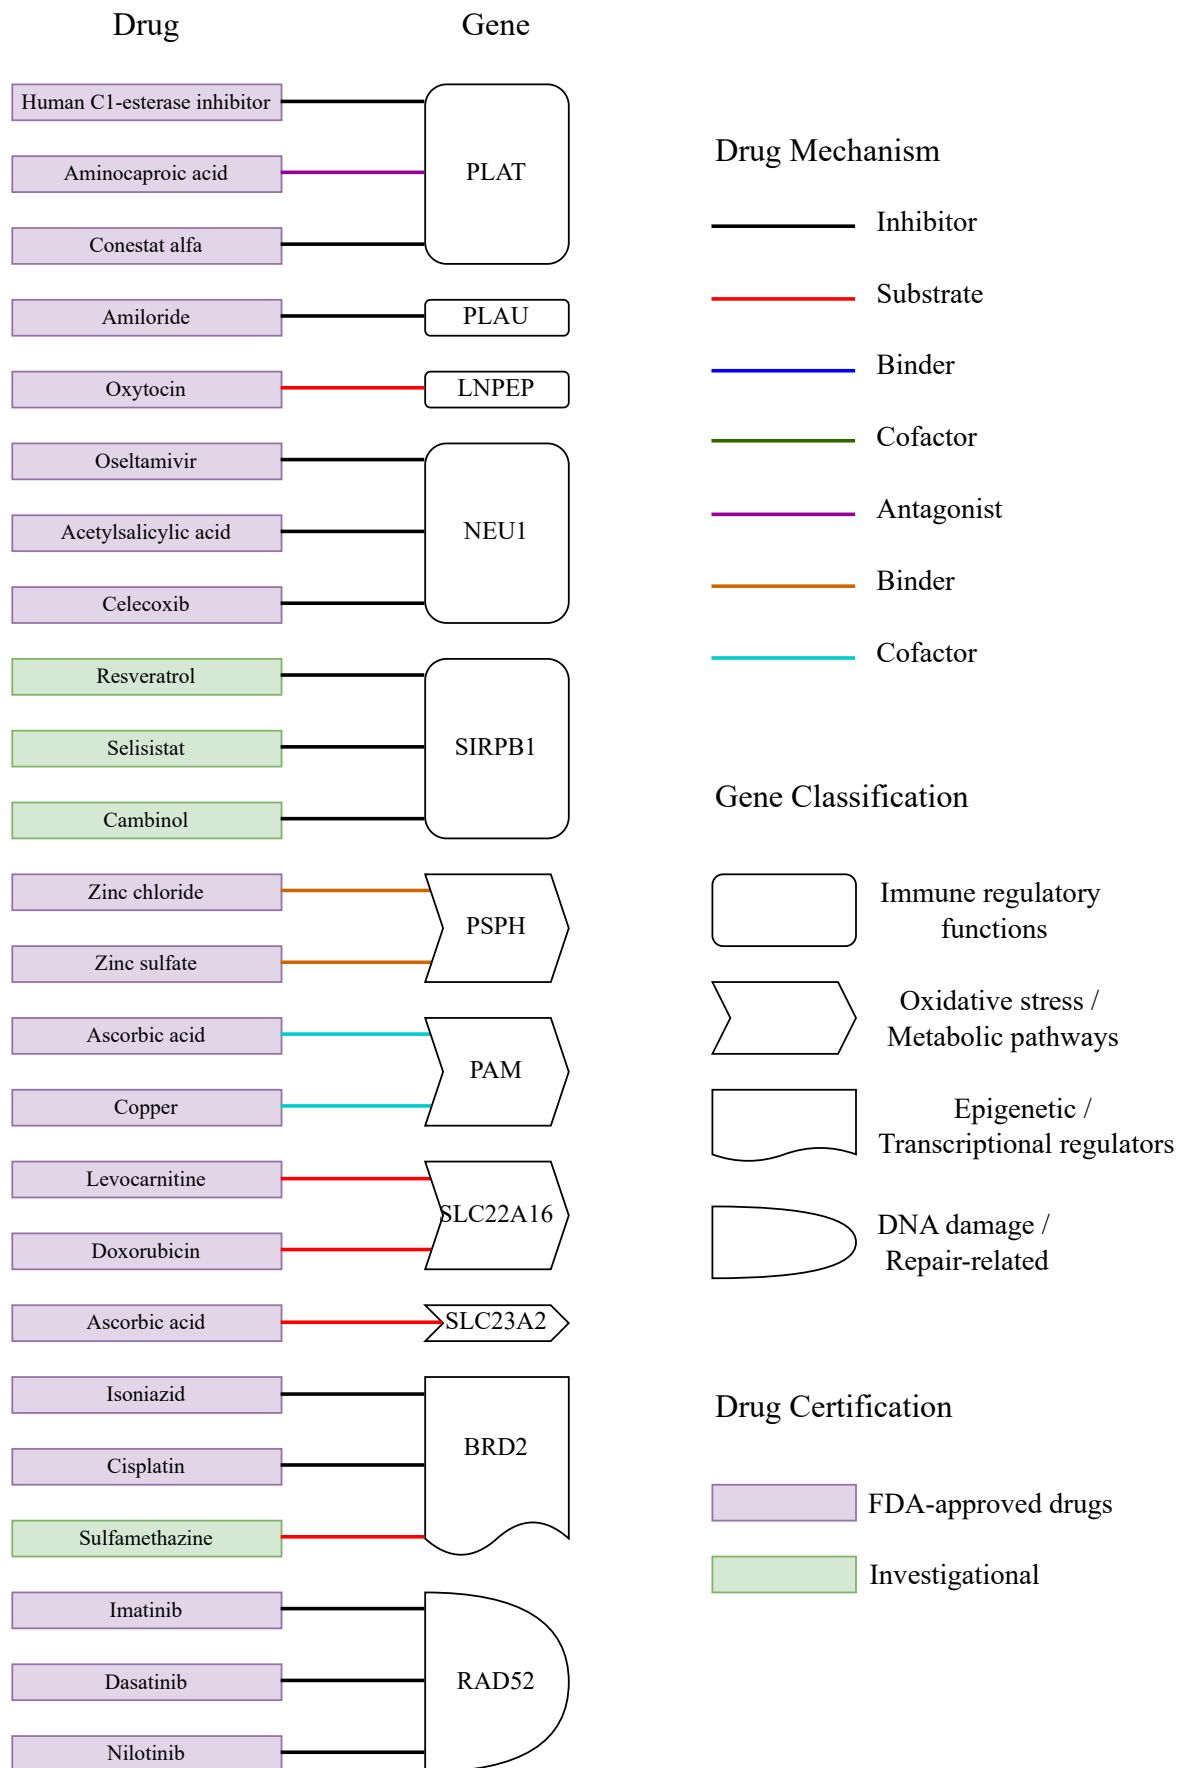

**Figure S1 Network diagram of prioritized druggable genes and their associated compounds.**

Supplement: Supplementary file 1 [file Supplementary Figure S1_1.pdf › Supplementary Figure S1_1.pdf]
